# Supplementary material for: Global patterns and predictors of marine biodiversity across taxa
Source: Springer Nature journal article supplement (doi:10.1038/nature09329), 2010-07-27
Supplement: 41586_2010_BFnature09329_MOESM316_ESM.pdf [file 41586_2010_BFnature09329_MOESM316_ESM.pdf]

## SUPPLEMENTARY INFORMATION

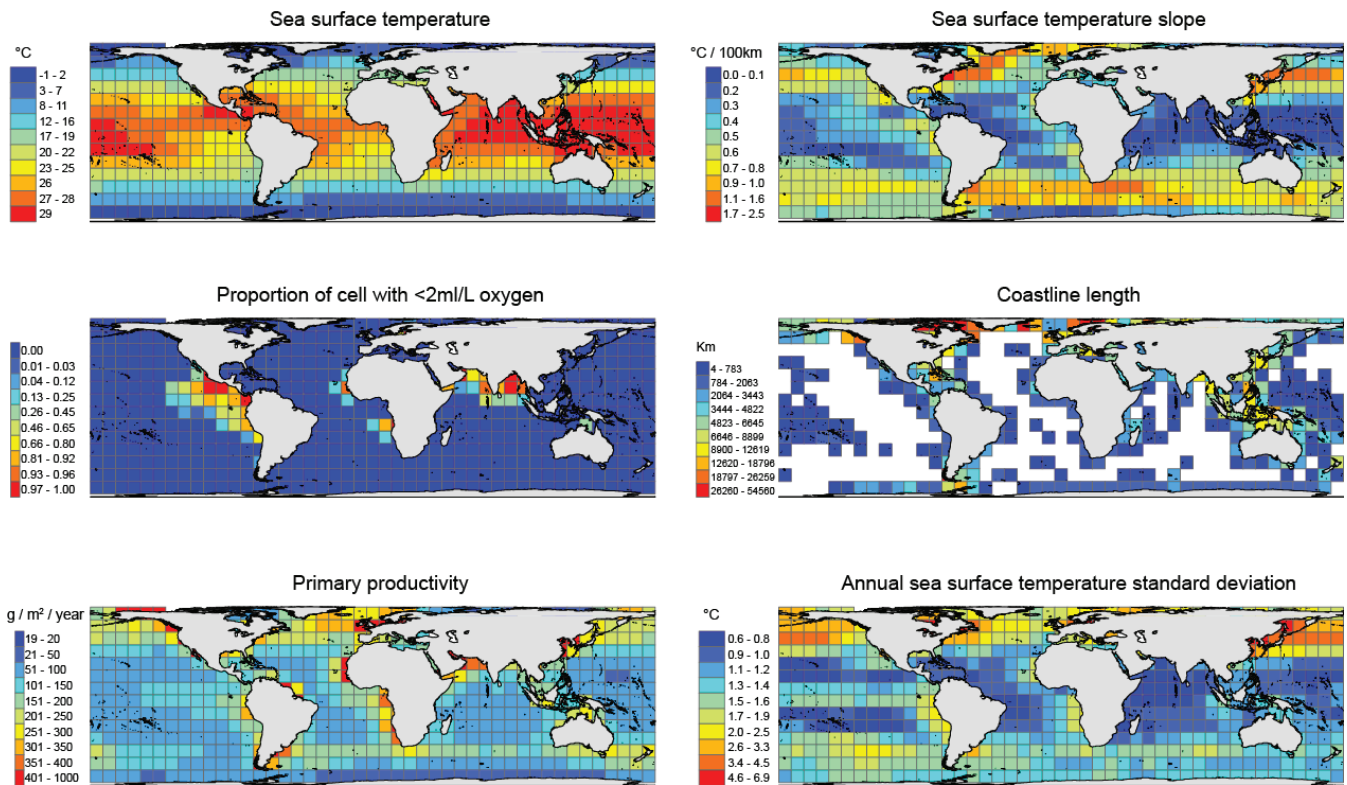

**Supplementary Figure S1.** Environmental variables used in the SLM and GLM analyses.

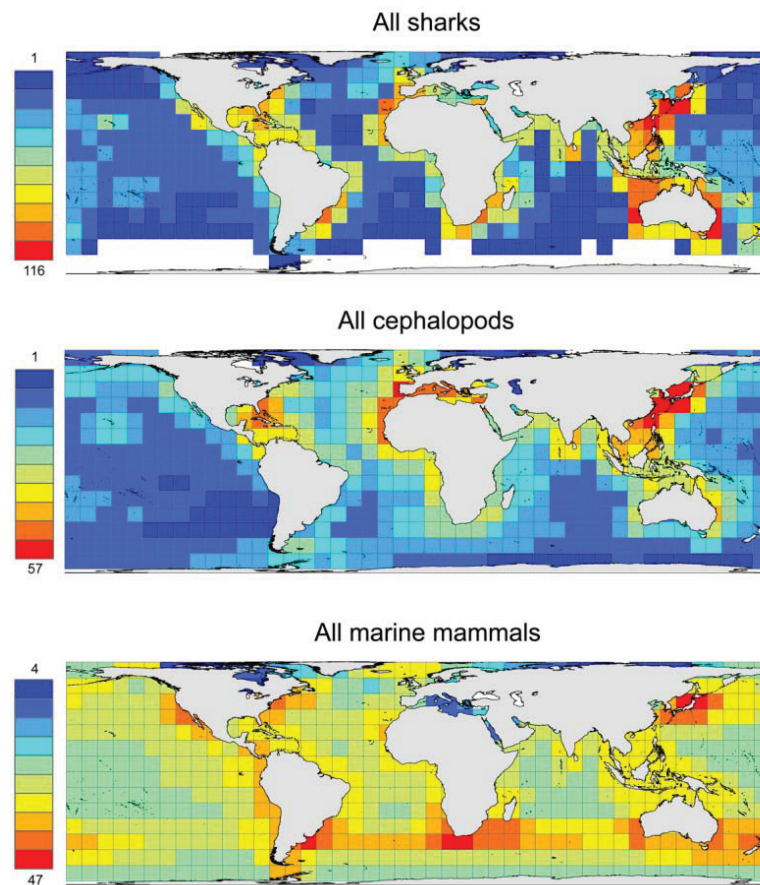

**Supplementary Figure S2.** Diversity patterns for species groups without partitioning into coastal and oceanic species.

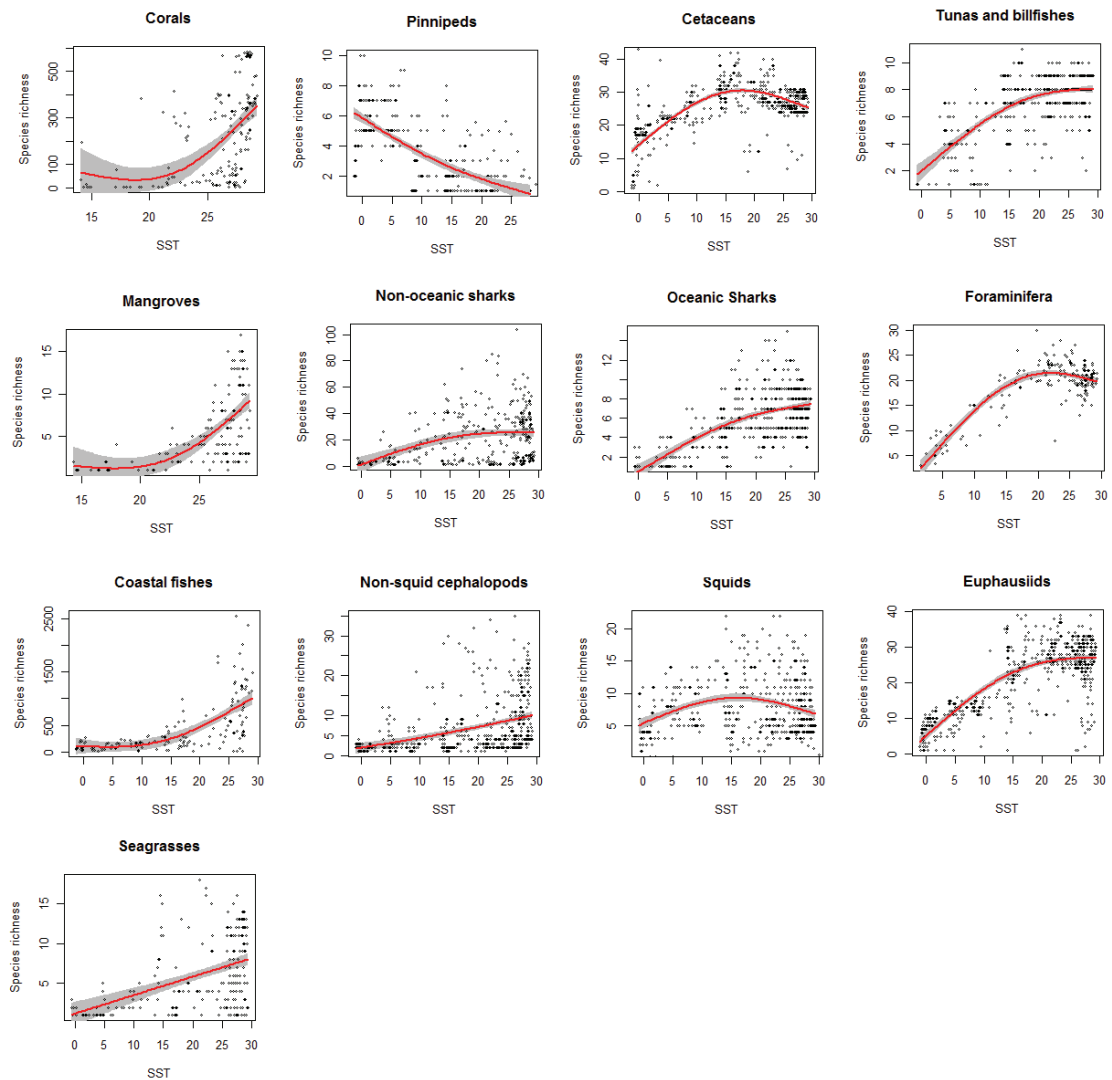

**Supplementary Figure S3.** Relationship between species richness and SST. Trends indicated by smoothed fit from generalized additive model with basis dimension 3 (red lines with grey area indicating 95% confidence limits).

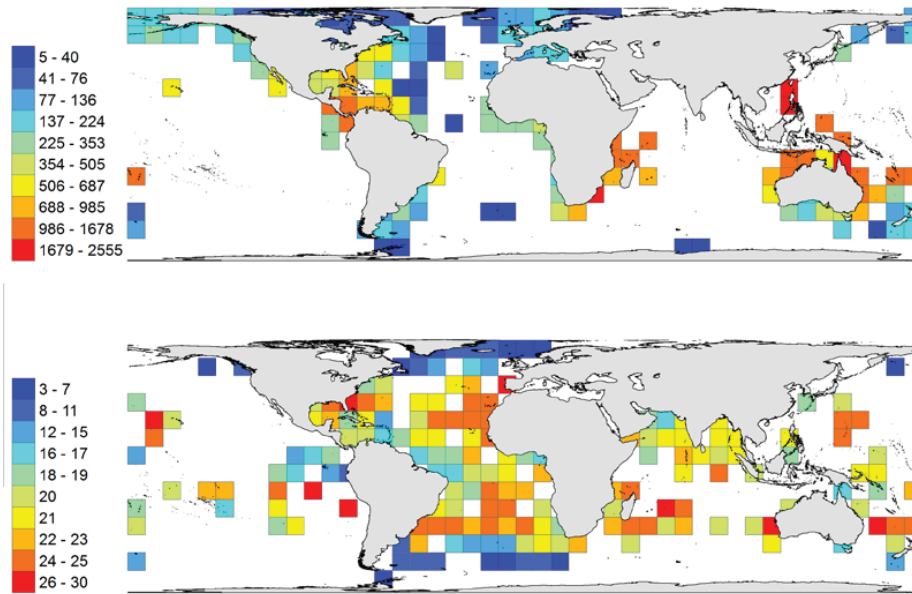

**Supplementary Figure S4.** Unkriged richness for coastal fishes (top) and foraminifera (bottom).

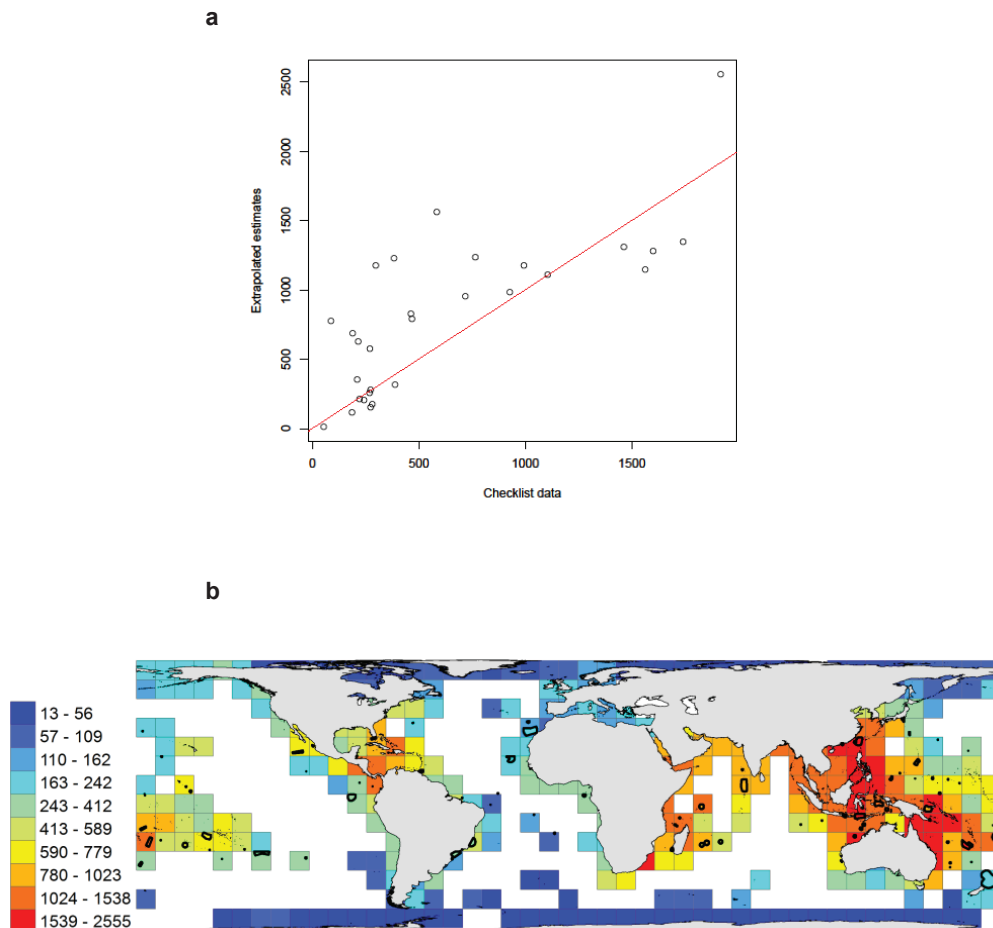

**Supplementary Figure S5:** (a) Correlation between extrapolated estimates of richness and independently gathered coastal fish checklist data. The red line is 1:1. Given the difference in spatial extent, and in predicted vs. observed species, we would expect predictions to be equal to or higher than checklist values. (b) Distribution and richness of checklist locations (dark black borders) against extrapolated richness.

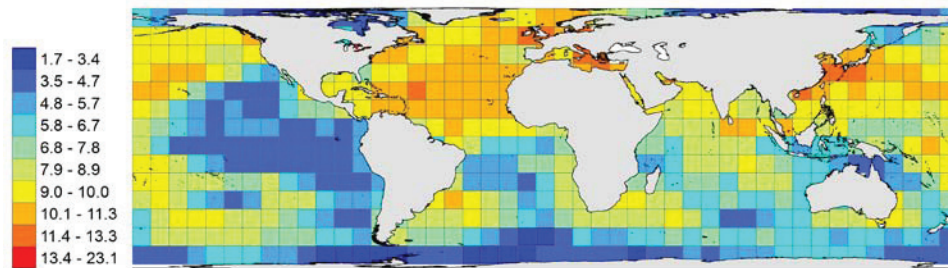

**Supplementary Figure S6:** Cumulative human impacts (relative index) derived from ref. 10.

**Supplementary Table S1.** Biological data sources used to construct species richness patterns

| Biological data                                                          | Source (ref.)                                   | Number of species  | Total number of known species                                                                | Number of cells used in analysis         | Type                             | Original resolution |
|--------------------------------------------------------------------------|-------------------------------------------------|--------------------|----------------------------------------------------------------------------------------------|------------------------------------------|----------------------------------|---------------------|
| Cephalopods<br>- <i>Squids</i><br>- <i>Non-squids</i>                    | 33,34                                           | 206                | 786 (Cephbase);<br>range data only<br>available for 209<br>species at present                | 523 (Squid)<br>519 (Non-<br>squid)       | Expert<br>verified range<br>maps | n/a                 |
| Corals (stony<br>shallow-water)                                          | 35,66                                           | 794                | 833 <sup>67</sup>                                                                            | 179                                      | Expert<br>verified range<br>maps | n/a                 |
| Euphausiids                                                              | 36                                              | 86                 | 86 <sup>36</sup>                                                                             | 528                                      | Expert<br>verified range<br>maps | n/a                 |
| Fishes<br>- <i>Coastal<br/>fishes</i>                                    | OBIS*<br>(www.iobis.org)                        | 9,713<br>(coastal) | 16,764 total (W. N.<br>Eschmeyer, <i>pers.<br/>comm.</i> );<br>~12,350 coastal <sup>29</sup> | 153                                      | Point samples                    | n/a                 |
| Foraminifera                                                             | 37                                              | 38                 | 44-45 (planktonic<br>only) <sup>68</sup>                                                     | 178                                      | Point samples                    | n/a                 |
| Marine<br>Mammals<br>- <i>Cetaceans</i><br>- <i>Pinnipeds</i>            | 38,66                                           | 120                | 120 <sup>38</sup>                                                                            | 539<br>(Cetaceans)<br>274<br>(Pinnipeds) | Range maps                       | n/a                 |
| Mangroves                                                                | 39,40                                           | 32                 | 53-75 <sup>69**</sup>                                                                        | 156                                      | Range maps                       | n/a                 |
| Seagrasses                                                               | 41-44                                           | 60                 | 60 <sup>44</sup>                                                                             | 212                                      | Range maps,<br>point data        | n/a                 |
| Sharks<br>- <i>Oceanic<br/>sharks</i><br>- <i>Non-oceanic<br/>sharks</i> | 45                                              | 507                | 507 <sup>45</sup>                                                                            | 450 (Oceanic)<br>330 (Non-<br>oceanic)   | Gridded                          | 1 degree            |
| Tunas and<br>billfishes                                                  | 7 combined with<br>FAO catch data<br>1990-99*** | 12                 | 19 <sup>7</sup>                                                                              | 435                                      | Gridded                          | 5 degrees           |

\* Ocean Biogeographical Information System

\*\* Depending on the definition adopted and the classification provided by different authors, the number of mangrove species may vary between 48<sup>70</sup>, 53<sup>71</sup>, 69<sup>72</sup>, 75<sup>73</sup>, and 101<sup>74</sup>. More general overviews consider 54-75 species<sup>75</sup> or 53-75<sup>69</sup>.

\*\*\* Derived from <http://www.fao.org/fishery/statistics/tuna-catches/en>

**Supplementary Table S2.** Environmental data sources used for SLM and GLM analyses.

| <b>Environmental data</b>      | <b>Source</b>                                                                                 | <b>Units</b>           | <b>Original resolution</b> |
|--------------------------------|-----------------------------------------------------------------------------------------------|------------------------|----------------------------|
| Coastline length               | World Database of Protected Areas ( <a href="http://www.wdpa.org/">http://www.wdpa.org/</a> ) | km                     | n/a                        |
| Sea Surface Temperature (SST)  | NASA optimum interpolation SST <sup>49</sup>                                                  | °C                     | 1 degree                   |
| Oxygen <2 ml/L                 | World Ocean Atlas 2005 <sup>47</sup>                                                          | ml/L                   | 1 degree                   |
| Mean standard deviation of SST | AVHRR Pathfinder version 5.0 <sup>50</sup>                                                    | °C                     | 4 km                       |
| Primary Productivity           | Vertically Generalized Productivity Model <sup>51</sup>                                       | g C/m <sup>2</sup> /yr | 0.086 degree               |
| Mean maximum SST slope         | NASA optimum interpolation SST <sup>49</sup>                                                  | °C/100km               | 1 degree                   |
| Ocean basin                    | n/a                                                                                           | Categorical            | n/a                        |



**Supplementary Table S3.** Correlations between gridded species richness by taxon. Correlations with an absolute value of greater than 0.5 are indicated in bold.

|                       | Corals      | Euphausiids  | Foraminifera | Cetaceans   | Pinnipeds    | Mangroves   | Seagrasses  | Oceanic sharks | Non-oceanic sharks | Tunas and billfishes | Squids      | Non-squid cephalopods | Coastal fishes |
|-----------------------|-------------|--------------|--------------|-------------|--------------|-------------|-------------|----------------|--------------------|----------------------|-------------|-----------------------|----------------|
| Corals                |             | 0.25         | 0.12         | 0.07        | 0.03         | <b>0.55</b> | <b>0.57</b> | -0.05          | 0.16               | 0.27                 | -0.16       | 0.24                  | <b>0.71</b>    |
| Euphausiids           | 0.25        |              | <b>0.73</b>  | <b>0.61</b> | <b>-0.60</b> | -0.04       | 0.20        | <b>0.57</b>    | 0.20               | <b>0.72</b>          | 0.21        | 0.12                  | <b>0.61</b>    |
| Foraminifera          | 0.12        | <b>0.73</b>  |              | 0.43        | <b>-0.78</b> | -0.20       | 0.28        | 0.49           | 0.20               | <b>0.59</b>          | 0.06        | 0.22                  | 0.36           |
| Cetaceans             | 0.07        | <b>0.61</b>  | 0.43         |             | -0.39        | 0.06        | 0.27        | 0.45           | 0.45               | 0.41                 | 0.32        | 0.25                  | 0.43           |
| Pinnipeds             | 0.03        | <b>-0.60</b> | <b>-0.78</b> | -0.39       |              | -0.36       | -0.38       | -0.47          | -0.42              | -0.42                | -0.25       | -0.30                 | -0.43          |
| Mangroves             | <b>0.55</b> | -0.04        | -0.20        | 0.06        | -0.36        |             | 0.37        | -0.21          | 0.16               | 0.03                 | -0.03       | 0.47                  | 0.38           |
| Seagrasses            | <b>0.57</b> | 0.20         | 0.28         | 0.27        | -0.38        | 0.37        |             | 0.22           | <b>0.53</b>        | 0.23                 | 0.01        | 0.48                  | <b>0.60</b>    |
| Oceanic sharks        | -0.05       | <b>0.57</b>  | 0.49         | 0.45        | -0.47        | -0.21       | 0.22        |                | <b>0.53</b>        | 0.47                 | 0.27        | 0.30                  | <b>0.59</b>    |
| Non-oceanic sharks    | 0.16        | 0.20         | 0.20         | 0.45        | -0.42        | 0.16        | <b>0.53</b> | <b>0.53</b>    |                    | 0.13                 | 0.46        | <b>0.76</b>           | <b>0.70</b>    |
| Tunas and billfishes  | 0.27        | <b>0.72</b>  | <b>0.59</b>  | 0.41        | -0.42        | 0.03        | 0.23        | 0.47           | 0.13               |                      | 0.05        | 0.07                  | <b>0.52</b>    |
| Squids                | -0.16       | 0.21         | 0.06         | 0.32        | -0.25        | -0.03       | 0.01        | 0.27           | 0.46               | 0.05                 |             | <b>0.56</b>           | 0.24           |
| Non-squid cephalopods | 0.24        | 0.12         | 0.22         | 0.25        | -0.30        | 0.47        | 0.48        | 0.30           | <b>0.76</b>        | 0.07                 | <b>0.56</b> |                       | <b>0.56</b>    |
| Coastal fishes        | <b>0.71</b> | <b>0.61</b>  | 0.36         | 0.43        | -0.43        | 0.38        | <b>0.60</b> | <b>0.59</b>    | <b>0.70</b>        | <b>0.52</b>          | 0.24        | <b>0.56</b>           |                |

**Supplementary Table S4.** Correlations between environmental data.

|                                  | SST slope | SST   | Prop. Cell <2ml/L O <sub>2</sub> | Length of coastline | Primary productivity | Annual SST range |
|----------------------------------|-----------|-------|----------------------------------|---------------------|----------------------|------------------|
| SST slope                        |           | -0.32 | -0.10                            | 0.00                | 0.29                 | 0.45             |
| SST                              | -0.32     |       | 0.22                             | -0.30               | -0.02                | -0.43            |
| Prop. Cell <2ml/L O <sub>2</sub> | -0.10     | 0.22  |                                  | -0.02               | 0.23                 | 0.00             |
| Length of coastline              | 0.00      | -0.30 | -0.02                            |                     | 0.22                 | 0.29             |
| Primary productivity             | 0.29      | -0.02 | 0.23                             | 0.22                |                      | 0.47             |
| Annual SST range                 | 0.45      | -0.43 | 0.00                             | 0.29                | 0.47                 |                  |

**Supplementary Table S5.** Single predictor spatial linear models (SLMs). Numbers are z-test values. Largest absolute z-test values for each taxon in bold; asterisks indicate significance of individual predictors: one asterisk is  $P < 0.05$ , two asterisks is  $P < 0.01$ , three asterisks is  $P < 1e-05$ . (Ind.) and (Pac.) indicate contrasts against the Atlantic Ocean for the Indian and Pacific Oceans, respectively.

| Taxon                         | SST             | SST slope     | Prop. cell<br><2ml/L O <sub>2</sub> | Length of<br>coastline | Primary<br>productivity | Annual SST<br>range | Ocean basin                  |
|-------------------------------|-----------------|---------------|-------------------------------------|------------------------|-------------------------|---------------------|------------------------------|
| Primarily coastal species     |                 |               |                                     |                        |                         |                     |                              |
| Pinnipeds                     | <b>-6.8</b> *** | 3.6**         | -1.1                                | 5.3***                 | 5.3***                  | 2.2*                | -0.6 (Ind.)<br>-1.3 (Pac.)   |
| Non-oceanic<br>sharks         | 3.8**           | 0.6           | 1.2                                 | <b>12.4</b> ***        | 4.1**                   | -0.1                | 0.1 (Ind.)<br>-0.5 (Pac.)    |
| Coastal fish                  | <b>5.0</b> ***  | 1.5           | 0.4                                 | 4.9***                 | 2.1*                    | -0.9                | 2.4* (Ind.)<br>2.3* (Pac.)   |
| Non-squid<br>cephalopods      | <b>6.1</b> ***  | -0.7          | 2.4*                                | 5.9***                 | 1.6                     | -2.5*               | -1.2 (Ind.)<br>-2.1* (Pac.)  |
| Corals<br>(shallow-<br>water) | <b>6.7</b> ***  | -2.6**        | 0.5                                 | 2.6**                  | -2.6**                  | -3.6**              | 1.9 (Ind.)<br>1.7 (Pac.)     |
| Mangroves                     | <b>9.0</b> ***  | -5.0***       | 2.7**                               | 1.1                    | -2.5*                   | -4.1**              | 1.5 (Ind.)<br>1.0 (Pac.)     |
| Seagrasses                    | <b>3.7</b> **   | -0.9          | 0.5                                 | 3.6**                  | -0.5                    | -2.4*               | 2.2* (Ind.)<br>1.7 (Pac.)    |
| Primarily oceanic species     |                 |               |                                     |                        |                         |                     |                              |
| Cetaceans                     | 6.2***          | 1.6           | 1.1                                 | 2.1*                   | <b>11.8</b> ***         | 2.0*                | -1.7 (Ind.)<br>-3.0** (Pac.) |
| True oceanic<br>sharks        | <b>11.2</b> *** | -2.7**        | 0.8                                 | 5.5***                 | -1.0                    | -3.9**              | 3.0** (Ind.)<br>3.1** (Pac.) |
| Tunas and<br>billfishes       | <b>8.4</b> ***  | -1.7          | 1.8                                 | -0.7                   | -2.7**                  | -5.7***             | 1.7 (Ind.)<br>1.3 (Pac.)     |
| Squids                        | 2.2*            | <b>3.6</b> ** | 0.4                                 | 1.8                    | 1.8                     | -0.1                | -1.3 (Ind.)<br>-1.9 (Pac.)   |
| Euphausiids                   | <b>9.2</b> ***  | -1.2          | -0.9                                | -0.6                   | 2.0*                    | -7.6***             | 1.6 (Ind.)<br>0.2 (Pac.)     |
| Foraminifera                  | <b>14.7</b> *** | -1.00         | -1.1                                | -2.3                   | 0.2                     | -2.4*               | 0.9 (Ind.)<br>0.3 (Pac.)     |

**Supplementary Table S6.** Single predictor generalized linear models (GLMs). Numbers are *t*-test values. Largest absolute *t*-test values for each taxon in bold; asterisks indicate significance of individual predictors: one asterisk is  $P < 0.05$ , two asterisks is  $P < 0.01$ , three asterisks is  $P < 1e-05$ . (Ind.) and (Pac.) indicate contrasts against the Atlantic Ocean for the Indian and Pacific Oceans, respectively.

| Taxon                           | SST             | SST slope | Prop. cell<br><2ml/L O <sub>2</sub> | Length of<br>coastline | Primary<br>productivity | Annual SST<br>range | Ocean basin                      |
|---------------------------------|-----------------|-----------|-------------------------------------|------------------------|-------------------------|---------------------|----------------------------------|
| Primarily coastal species       |                 |           |                                     |                        |                         |                     |                                  |
| Pinnipeds                       | <b>-17.1***</b> | -1.4      | -2.7**                              | 5.9***                 | -2.3*                   | 2.3*                | 2.0* (Ind.)<br>0.1 (Pac.)        |
| Non-oceanic<br>sharks           | 8.7***          | -1.3      | 3.5**                               | <b>8.9***</b>          | 6.2***                  | -2.5*               | 2.5* (Ind.)<br>-0.8 (Pac.)       |
| Coastal fish                    | <b>9.0***</b>   | -2.1*     | 1.7                                 | 3.4**                  | 1.8                     | -4.7***             | 4.4*** (Ind.)<br>3.7*** (Pac.)   |
| Non-squid<br>cephalopods        | <b>12.6***</b>  | -5.8***   | 4.3**                               | 11.4***                | 10.5***                 | -1.7                | -1.3<br>-5.2*** (Pac.)           |
| Corals (stony<br>shallow-water) | <b>9.3***</b>   | -6.6***   | -1.1                                | 1.8                    | -4.2**                  | -4.0**              | 6.6*** (Ind.)<br>6.9*** (Pac.)   |
| Mangroves                       | <b>11.0***</b>  | -8.4***   | 1.6                                 | 3.7**                  | -2.2*                   | -3.6**              | 0.1 (Ind.)<br>2.3* (Pac.)        |
| Seagrasses                      | <b>8.2***</b>   | -5.2***   | -0.2                                | 0.8                    | -2.3*                   | -4.9***             | 8.1*** (Ind.)<br>5.4*** (Pac.)   |
| Primarily oceanic species       |                 |           |                                     |                        |                         |                     |                                  |
| Cetaceans                       | <b>18.9***</b>  | 4.7***    | 2.5*                                | -6.5***                | 13.2***                 | -4.8***             | 6.6*** (Ind.)<br>6.9*** (Pac.)   |
| True oceanic<br>sharks          | <b>22.6***</b>  | -6.0***   | 3.0**                               | 0.4                    | -3.9**                  | -8.1***             | 0.2 (Ind.)<br>1.2 (Pac.)         |
| Tunas and<br>billfishes         | <b>18.6***</b>  | -3.8**    | 1.5                                 | -2.7**                 | -0.7                    | -5.0***             | 3.0** (Ind.)<br>4.3** (Pac.)     |
| Squids                          | 3.8**           | 4.1**     | 1.3                                 | 4.4**                  | <b>11.1***</b>          | 4.0**               | -8.0*** (Ind.)<br>-8.9*** (Pac.) |
| Euphausiids                     | <b>24.6***</b>  | -1.0      | -0.1                                | -9.9***                | -1.6                    | -11.4***            | 1.2 (Ind.)<br>3.0** (Pac.)       |
| Foraminifera                    | <b>20.2***</b>  | -5.8***   | 0.67                                | -2.6**                 | -3.2**                  | -7.1***             | 3.4*** (Ind.)<br>1.8 (Pac.)      |

**Supplementary Table S7.** GLM results for minimal adequate models. Numbers indicate *t*-values, asterisks indicate significance of individual predictors: one asterisk is  $P < 0.05$ , two asterisks is  $P < 0.01$ , three asterisks is  $P < 1e-05$ . (Ind.) and (Pac.) indicate contrasts against the Atlantic Ocean for the Indian and Pacific Oceans, respectively.

| Taxon                        | SST      | SST slope | O <sub>2</sub> less than 2ml/L | Length of coastline | Primary productivity | SST range | Ocean                            | Pseudo-r <sup>2</sup> |
|------------------------------|----------|-----------|--------------------------------|---------------------|----------------------|-----------|----------------------------------|-----------------------|
| Primarily coastal species    |          |           |                                |                     |                      |           |                                  |                       |
| Pinnipeds                    | -19.7*** | 5.9***    | 2.2*                           | 4.9***              | 5.9***               | -2.6**    | 2.6** (Ind.)<br>2.2* (Pac.)      | 0.68                  |
| Non-oceanic sharks           | 13.6***  | 4.4**     |                                | 14.5***             | 8.1***               | -4.1***   |                                  | 0.63                  |
| Coastal fish                 | 14.7***  |           |                                | 9.3***              |                      |           | 4.6*** (Ind.)<br>6.1*** (Pac.)   | 0.68                  |
| Non-squid cephalopods        | 16.5***  | -4.2***   |                                | 14.1***             | 7.0***               |           | -0.7 (Ind.)<br>-7.4*** (Pac.)    | 0.64                  |
| Corals (stony shallow-water) | 13.3***  | -6.0***   |                                | 5.8***              |                      |           | 10.9*** (Ind.)<br>10.4*** (Pac.) | 0.66                  |
| Mangroves                    | -6.2***  | -2.6**    |                                | 5.0***              |                      |           |                                  | 0.53                  |
| Seagrasses                   | 9.8***   |           | -4.3**                         | 6.9***              |                      |           | 8.5*** (Ind.)<br>6.3*** (Pac.)   | 0.52                  |
| Primarily oceanic species    |          |           |                                |                     |                      |           |                                  |                       |
| Cetaceans                    | 10.2***  | 9.1***    |                                | -3.1**              | 12.1***              | -8.7***   | 2.9** (Ind.)<br>4.1** (Pac.)     | 0.63                  |
| True oceanic sharks          | 20.5***  | 3.2**     |                                | 4.6***              | 2.3*                 | -2.6**    | -2.2* (Ind.)<br>1.4 (Pac.)       | 0.58                  |
| Tunas and billfishes         | 19.4***  | 5.3***    |                                | -3.1**              |                      |           |                                  | 0.50                  |
| Squids                       | 5.4***   | 3.0**     |                                | 3.7**               | 5.4***               |           | -7.1*** (Ind.)<br>-8.5*** (Pac.) | 0.33                  |
| Euphausiids                  | 22.5***  | 9.2***    | -3.6**                         | -4.5***             |                      | -5.6***   |                                  | 0.68                  |
| Foraminifera                 | 19.4***  | 4.1**     | -3.5**                         | -3.5**              | 2.5*                 | -2.4*     |                                  | 0.77                  |

**Supplementary Table S8.** AIC and Morans I values for minimal adequate GLMs and SLMs.

| Taxon & source            | AIC (GLM) | AIC (SLM) | Morans I (GLM residuals) | Morans I (SLM residuals) |
|---------------------------|-----------|-----------|--------------------------|--------------------------|
| Primarily oceanic species |           |           |                          |                          |
| Cetaceans                 | -715.1    | -1190.4   | 0.64***                  | 0.0044                   |
| True oceanic sharks       | -255.1    | -524.0    | 0.58***                  | -0.032                   |
| Tunas and billfishes      | -428.0    | -648.9    | 0.53***                  | -0.055                   |
| Squids                    | -213.5    | -884.9    | 0.76***                  | 0.0075                   |
| Euphausiids               | -280.7    | -548.8    | 0.46***                  | -0.046                   |
| Foraminifera              | -361.1    | -368.9    | 0.15**                   | -0.0038                  |
| Primarily coastal species |           |           |                          |                          |
| Pinnipeds                 | -127.8    | -322.7    | 0.63***                  | -0.069                   |
| Non-oceanic sharks        | 249.4     | 166.2     | 0.34***                  | -0.022                   |
| Coastal fish              | 104.6     | 92.1      | 0.22**                   | -0.012                   |
| Non-squid cephalopods     | 12.00     | -427.7    | 0.58***                  | -0.058                   |
| Corals (shallow-water)    | 208.6     | 183.9     | 0.22***                  | -0.039                   |
| Mangroves                 | 7.6       | -123.8    | 0.65***                  | -0.036                   |
| Seagrasses                | 76.4      | -14.9     | 0.44***                  | -0.0037                  |

### Supplementary references

- <sup>66</sup> IUCN. IUCN Red List of Threatened Species, Version 2009.01 <<http://www.iucnredlist.org>> (2009).
- <sup>67</sup> Veron, J. E. N. *Corals in Space and Time*. (Comstock Publishing, 1995).
- <sup>68</sup> Hemleben, C., Spindler, M. & Anderson, O. R. *Modern Planktonic Foraminifera*. (Springer-Verlag, 1989).
- <sup>69</sup> FAO World Atlas of Mangroves. < <http://www.fao.org/forestry/mangrove/atlas/26319/en/>> (2005).
- <sup>70</sup> Tomlinson P.B. *The Botany of Mangroves*. (Cambridge University Press, 1986).
- <sup>71</sup> Blasco, F. in *The Mangrove Ecosystem: Research Methods* (eds. Snedaker S.C. & Snedaker, J. G.) (UNESCO, 1984).
- <sup>72</sup> Duke, N.C. in *Tropical Mangrove Ecosystems* (eds. Robertson A. I. & Alongi, D. M.) (American Geophysical Union, 1992).
- <sup>73</sup> Lugo, A.E. & Snedaker, S.C. The ecology of mangroves. *Ann. Rev. Ecol. Syst.* **5**, 39-64 (1974).
- <sup>74</sup> Kathiresan, K. & Qasin, S.Z. *Biodiversity of Mangrove Ecosystems*. (Hindustan Publishing Corporation, 2005).
- <sup>75</sup> Mangrove Action Project. URL: <http://mangroveactionproject.org/mangroves> (2002).
